# Supplementary material for: Microsporidia in Commercially Harvested Marine Fish: A Potential Health Risk for Consumers
Source: MDPI journal article supplement (doi:10.3390/ani13162673), 2023-08-19
Supplement: s1 [file s1]

**Table S1.** Farmed species sampled. Sampling data, location, and number of positives at the gastrointestinal tract are indicated.

| Species                                           | Sampling data | Location | Number of individuals | Enterocytozoonidae positives | <i>E. hellem/E. intestinalis</i> positives |
|---------------------------------------------------|---------------|----------|-----------------------|------------------------------|--------------------------------------------|
| European sea bass ( <i>Dicentrarchus labrax</i> ) | 14/07/2020    | Farm 4   | 12                    | 2                            | 1                                          |
|                                                   | 24/07/2020    | Farm 2   | 14                    | 1                            | 1                                          |
|                                                   | 15/09/2020    | Farm 1   | 14                    | 0                            | 0                                          |
|                                                   | 21/10/2020    | Farm 2   | 10                    | 0                            | 0                                          |
|                                                   | 05/05/2021    | Farm 1   | 10                    | 0                            | 0                                          |
|                                                   | 12/05/2021    | Farm 3   | 9                     | 0                            | 0                                          |
|                                                   | 21/07/2021    | Farm 3   | 10                    | 0                            | 0                                          |
|                                                   |               |          | <b>79</b>             | <b>3</b>                     | <b>2</b>                                   |
| Gilthead seabream ( <i>Sparus aurata</i> )        | 09/09/2020    | Farm 4   | 14                    | 0                            | 0                                          |
|                                                   | 15/10/2020    | Farm 4   | 14                    | 1                            | 0                                          |
|                                                   | 07/10/2021    | Farm 1   | 8                     | 0                            | 0                                          |
|                                                   |               |          | <b>36</b>             | <b>1</b>                     | <b>0</b>                                   |
| Meagre ( <i>Argyrosomus regius</i> )              | 29/09/2020    | Farm 2   | 12                    | 0                            | 0                                          |
|                                                   | 07/10/2020    | Farm 3   | 11                    | 0                            | 0                                          |
|                                                   |               |          | <b>23</b>             | <b>0</b>                     | <b>0</b>                                   |
| Total cultivated fish                             |               |          | <b>138</b>            | <b>4</b>                     | <b>2</b>                                   |

**Table S2.** Wild species sampled. Sampling data, location, and number of positives at the gastrointestinal tract are indicated.

| Species                                                  | Sampling data | Location      | Number of individuals | Enterocytozoonidae positives | <i>E. hellem/E. intestinalis</i> positives |
|----------------------------------------------------------|---------------|---------------|-----------------------|------------------------------|--------------------------------------------|
| Argentine ( <i>Argentina sphyraena</i> )                 | 02/06/2021    | Fish market 4 | 1                     | 0                            | 0                                          |
| Meagre ( <i>Argyrosomus regius</i> )                     | 02/06/2021    | Fish market 4 | 1                     | 0                            | 0                                          |
| Imperial scaldfish ( <i>Arnoglossus imperialis</i> )     | 02/06/2021    | Fish market 4 | 1                     | 0                            | 0                                          |
| Bogue ( <i>Boops boops</i> )                             | 15/03/2021    | Fish market 2 | 3                     | 0                            | 0                                          |
| Red gurnard ( <i>Chelidonichthys cuculus</i> )           | 29/06/2021    | Fish market 3 | 1                     | 0                            | 0                                          |
| Spotted flounder ( <i>Citharus linguatula</i> )          | 30/03/2021    | Fish market 3 | 1                     | 0                            | 0                                          |
|                                                          | 02/06/2021    | Fish market 4 | 1                     | 0                            | 0                                          |
|                                                          | 29/06/2021    | Fish market 3 | 3                     | 0                            | 0                                          |
| European conger ( <i>Conger conger</i> )                 | 09/03/2021    | Fish market 4 | 2                     | 0                            | 0                                          |
| Annular seabream ( <i>Diplodus annularis</i> )           | 15/03/2021    | Fish market 2 | 2                     | 1                            | 1                                          |
| Common two-banded seabream ( <i>Diplodus vulgaris</i> )  | 02/06/2021    | Fish market 4 | 1                     | 0                            | 0                                          |
| Blackbelly rosefish ( <i>Helicolenus dactylopterus</i> ) | 02/06/2021    | Fish market 4 | 1                     | 1                            | 0                                          |
| Brown wrasse ( <i>Labrus merula</i> )                    | 02/06/2021    | Fish market 4 | 1                     | 0                            | 0                                          |
| Large-scaled gurnard ( <i>Lepidotrigla cavillone</i> )   | 02/06/2021    | Fish market 4 | 1                     | 1                            | 0                                          |
| Blackbellied angler ( <i>Lophius budegassa</i> )         | 02/06/2021    | Fish market 4 | 1                     | 0                            | 0                                          |
|                                                          | 29/06/2021    | Fish market 3 | 1                     | 0                            | 0                                          |
| European hake ( <i>Merluccius merluccius</i> )           | 09/03/2021    | Fish market 4 | 3                     | 0                            | 0                                          |
|                                                          | 15/03/2021    | Fish market 2 | 2                     | 2                            | 0                                          |
|                                                          | 02/06/2021    | Fish market 4 | 1                     | 0                            | 0                                          |
|                                                          | 29/06/2021    | Fish market 3 | 5                     | 1                            | 0                                          |
| Blue whiting ( <i>Micromessistius poutassou</i> )        | 09/03/2021    | Fish market 4 | 2                     | 0                            | 0                                          |
|                                                          | 30/03/2021    | Fish market 3 | 2                     | 1                            | 0                                          |

|                                                                          |            |               |            |           |          |
|--------------------------------------------------------------------------|------------|---------------|------------|-----------|----------|
|                                                                          | 02/06/2021 | Fish market 4 | 1          | 1         | 0        |
| <b>Red mullet (<i>Mullus barbatus</i>)</b>                               | 09/03/2021 | Fish market 4 | 1          | 0         | 0        |
|                                                                          | 15/03/2021 | Fish market 2 | 1          | 0         | 1        |
|                                                                          | 30/03/2021 | Fish market 3 | 3          | 0         | 0        |
|                                                                          | 02/06/2021 | Fish market 4 | 1          | 0         | 0        |
|                                                                          | 29/06/2021 | Fish market 3 | 3          | 0         | 0        |
| <b>Surmullet (<i>Mullus surmuletus</i>)</b>                              | 09/03/2021 | Fish market 4 | 2          | 0         | 1        |
|                                                                          | 30/03/2021 | Fish market 3 | 1          | 1         | 0        |
| <b>Axillary seabream (<i>Pagellus acarne</i>)</b>                        | 15/03/2021 | Fish market 2 | 1          | 0         | 1        |
| <b>Common pandora (<i>Pagellus erytrinus</i>)</b>                        | 15/03/2021 | Fish market 2 | 4          | 0         | 1        |
|                                                                          | 30/03/2021 | Fish market 3 | 1          | 0         | 0        |
|                                                                          | 02/06/2021 | Fish market 4 | 1          | 0         | 1        |
| <b>African armoured searobin<br/>(<i>Peristedion cataphractum</i>)</b>   | 09/03/2021 | Fish market 4 | 1          | 0         | 0        |
| <b>Greater forkbeard (<i>Phycis blennoides</i>)</b>                      | 09/03/2021 | Fish market 4 | 3          | 0         | 0        |
|                                                                          | 30/03/2021 | Fish market 3 | 4          | 0         | 0        |
|                                                                          | 02/06/2021 | Fish market 4 | 1          | 1         | 0        |
| <b>Forkbeard (<i>Phycis phycis</i>)</b>                                  | 02/06/2021 | Fish market 4 | 1          | 0         | 0        |
| <b>Salema (<i>Sarpa salpa</i>)</b>                                       | 02/06/2021 | Fish market 4 | 1          | 0         | 0        |
| <b>Atlantic mackerel (<i>Scomber scombrus</i>)</b>                       | 09/03/2021 | Fish market 4 | 2          | 0         | 0        |
|                                                                          | 15/03/2021 | Fish market 2 | 1          | 0         | 0        |
|                                                                          | 14/06/2021 | Fish market 1 | 19         | 8         | 0        |
| <b>Lesser spotted dogfish (<i>Scyliorhinus canicula</i>)</b>             | 09/03/2021 | Fish market 3 | 3          | 0         | 0        |
| <b>Comber (<i>Serranus cabrilla</i>)</b>                                 | 09/03/2021 | Fish market 4 | 1          | 1         | 0        |
| <b>Brown comber (<i>Serranus hepatus</i>)</b>                            | 09/03/2021 | Fish market 4 | 1          | 0         | 1        |
|                                                                          | 30/30/2021 | Fish market 3 | 1          | 0         | 0        |
| <b>Greater weever (<i>Trachinus draco</i>)</b>                           | 30/03/2021 | Fish market 3 | 1          | 0         | 0        |
| <b>Mediterranean horse mackerel<br/>(<i>Trachurus mediterraneus</i>)</b> | 15/03/2021 | Fish market 2 | 2          | 1         | 0        |
|                                                                          | 02/06/2021 | Fish market 4 | 1          | 0         | 1        |
| <b>Pouting (<i>Trisopterus luscus</i>)</b>                               | 09/03/2021 | Fish market 4 | 1          | 0         | 0        |
|                                                                          | 15/03/2021 | Fish market 2 | 2          | 0         | 0        |
|                                                                          | 30/03/2021 | Fish market 3 | 6          | 0         | 0        |
|                                                                          | 02/06/2021 | Fish market 4 | 1          | 0         | 0        |
|                                                                          | 29/06/2021 | Fish market 3 | 2          | 0         | 0        |
| <b>Stargazer (<i>Uranoscopus scaber</i>)</b>                             | 02/06/2021 | Fish market 4 | 1          | 0         | 0        |
| <b>Total fish from fish markets</b>                                      |            |               | <b>113</b> | <b>20</b> | <b>8</b> |
